# Supplementary material for: Synthesis, Properties, and Biodegradability of Novel Sequence-Controlled Copolyesters Composed of Glycolic Acid, Dicarboxylic Acids, and C3 or C4 Diols
Source: MDPI journal article supplement (doi:10.3390/polym15051155), 2023-02-24
Supplement: s1 [file s1]

## Supporting Information

# Synthesis, properties, and biodegradability of novel se-quence-controlled copolyesters composed of glycolic acid, di-carboxylic acids, and C3 or C4 diols

Yuushou Nakayama<sup>1,\*</sup>, Keitaro Fukumoto<sup>1</sup>, Yuji Kusu<sup>1</sup>, Ryo Tanaka<sup>1</sup>, Takeshi Shiono<sup>1</sup>, Norioki Kawasaki<sup>2</sup>, Naoko Yamano<sup>2</sup>, Atsuyoshi Nakayama<sup>2</sup>

<sup>1</sup> Department of Applied Chemistry, Graduate School of Advanced Science and Engineering, Hiroshima University, 1-4-1 Kagamiyama, Higashi-Hiroshima Hiroshima 739-8527, Japan.

<sup>2</sup> Biomedical Research Institute, National Institute of Advanced Industrial Science and Technology (AIST), 1-8-31 Midorigaoka, Ikeda, Osaka 563-8577, Japan.

### Contents

**Figure S1:** <sup>1</sup>H NMR spectrum of GPG (CDCl<sub>3</sub>, 500 MHz, r.t.).

**Figure S2:** <sup>1</sup>H NMR spectrum of poly(GPGT) (run 4) (CDCl<sub>3</sub>, 500 MHz, r.t.).

**Figure S3:** <sup>1</sup>H NMR spectrum of poly(GBGF) (Run 5) (CDCl<sub>3</sub>, 500 MHz, r.t.).

**Figure S4:** <sup>1</sup>H NMR spectrum of poly(GPGF) (Run 9) (CDCl<sub>3</sub>, 500 MHz, r.t.).

**Figure S5:** <sup>1</sup>H NMR spectrum of spectrum of poly(GBGA) (Run 14) (CDCl<sub>3</sub>, 500 MHz, r.t.).

**Figure S6:** DSC profiles of poly(GBGT) (Run 1).

**Figure S7:** DSC profiles of poly(GPGT) (Run 4).

**Figure S8:** DSC profiles of poly(GBGF) (Run 7).

**Figure S9:** DSC profiles of poly(GPGF) (Run 11).

**Figure S10:** DSC profiles of poly(GBGA) (Run 12).

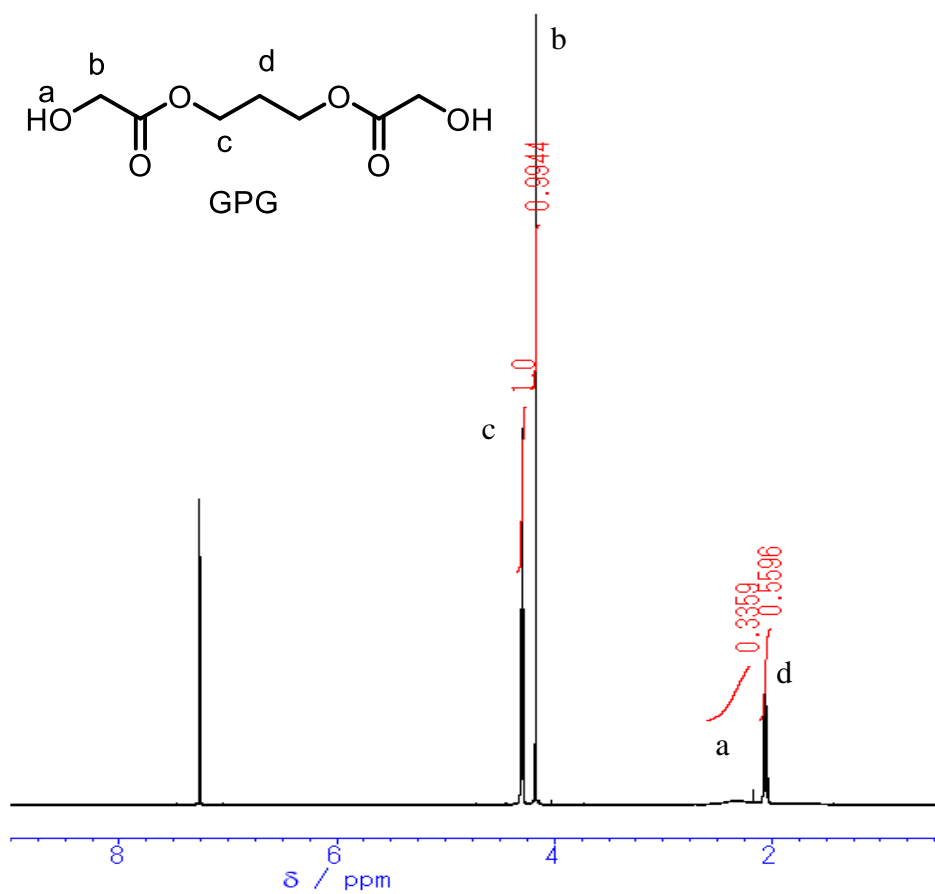

**Figure S1:**  $^1\text{H}$  NMR spectrum of GPG ( $\text{CDCl}_3$ , 500 MHz, r.t.).

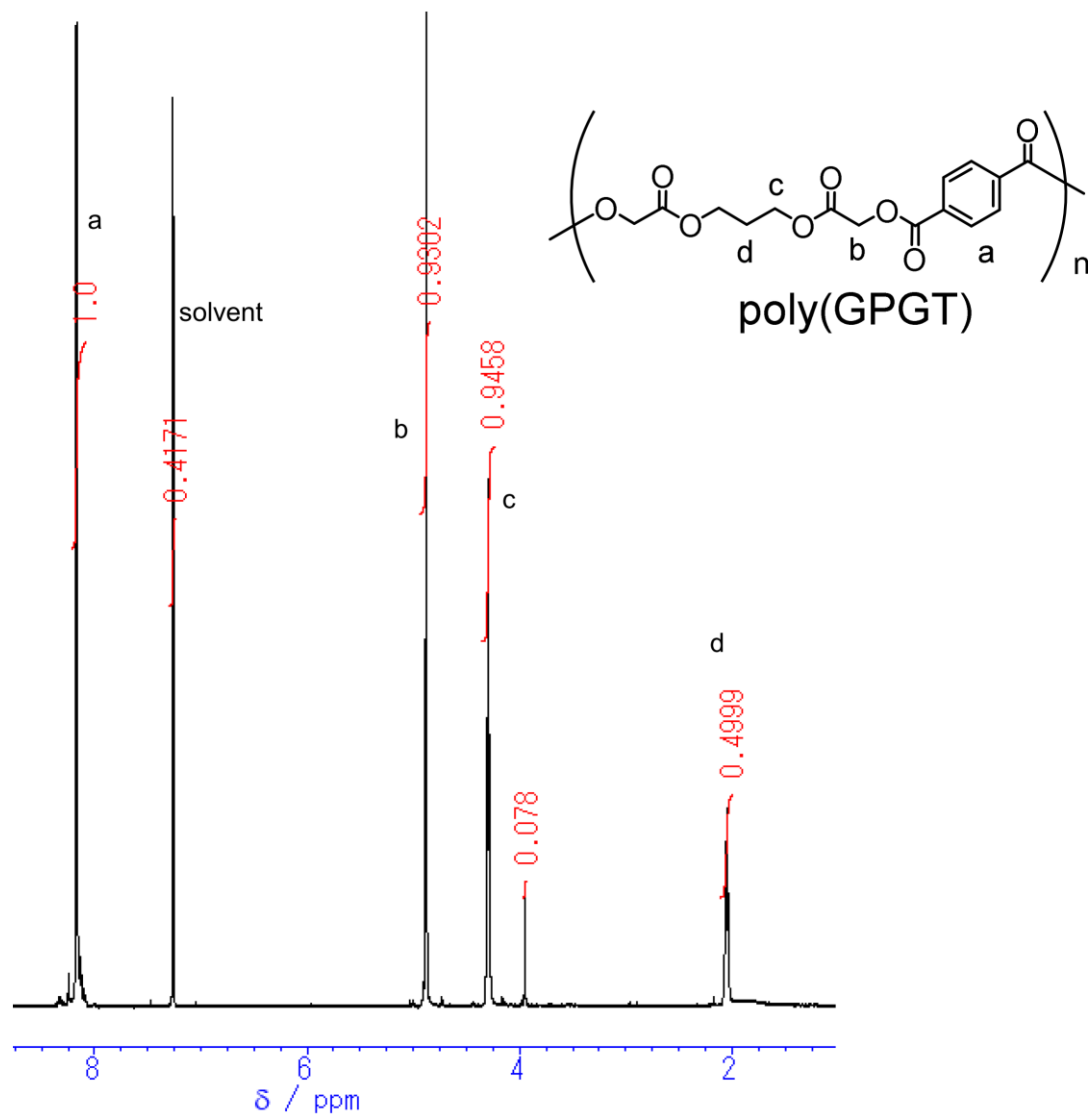

**Figure S2:**  $^1\text{H}$  NMR spectrum of poly(GPGT) (run 4) ( $\text{CDCl}_3$ , 500 MHz, r.t.).

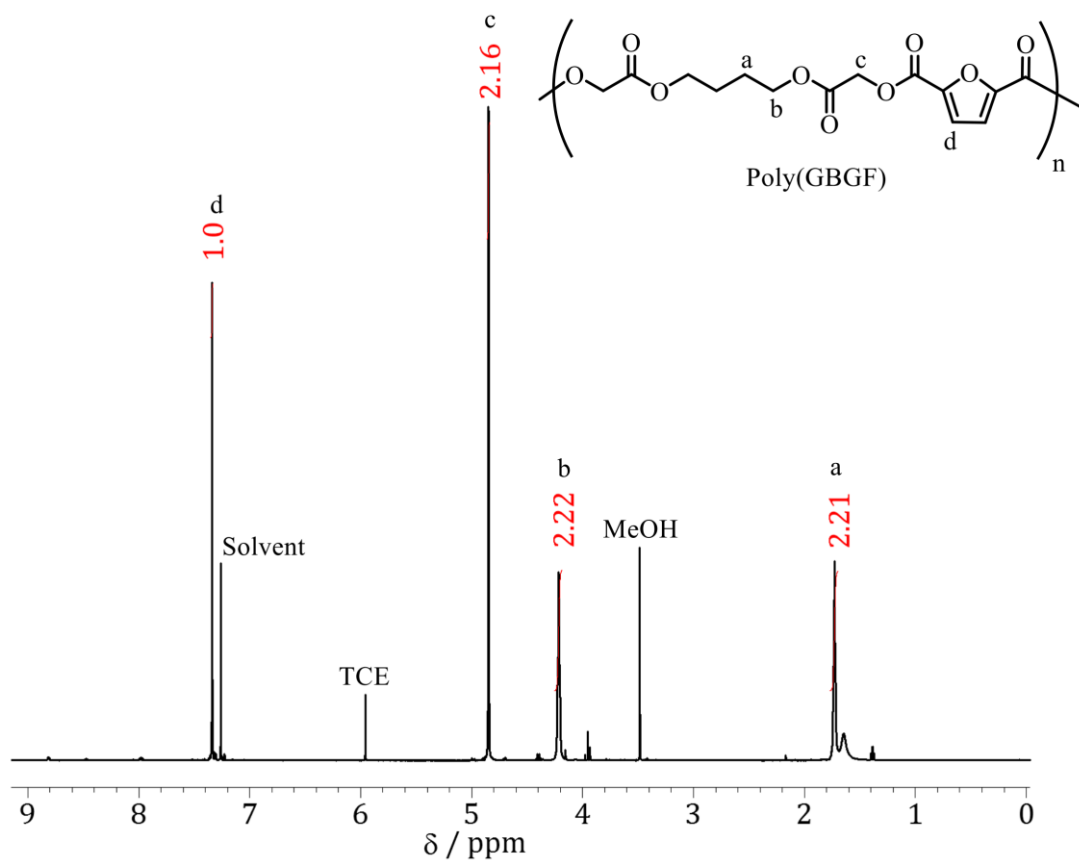

**Figure S3:**  $^1\text{H}$  NMR spectrum of poly(GBGF) (Run 5) ( $\text{CDCl}_3$ , 500 MHz, r.t.).

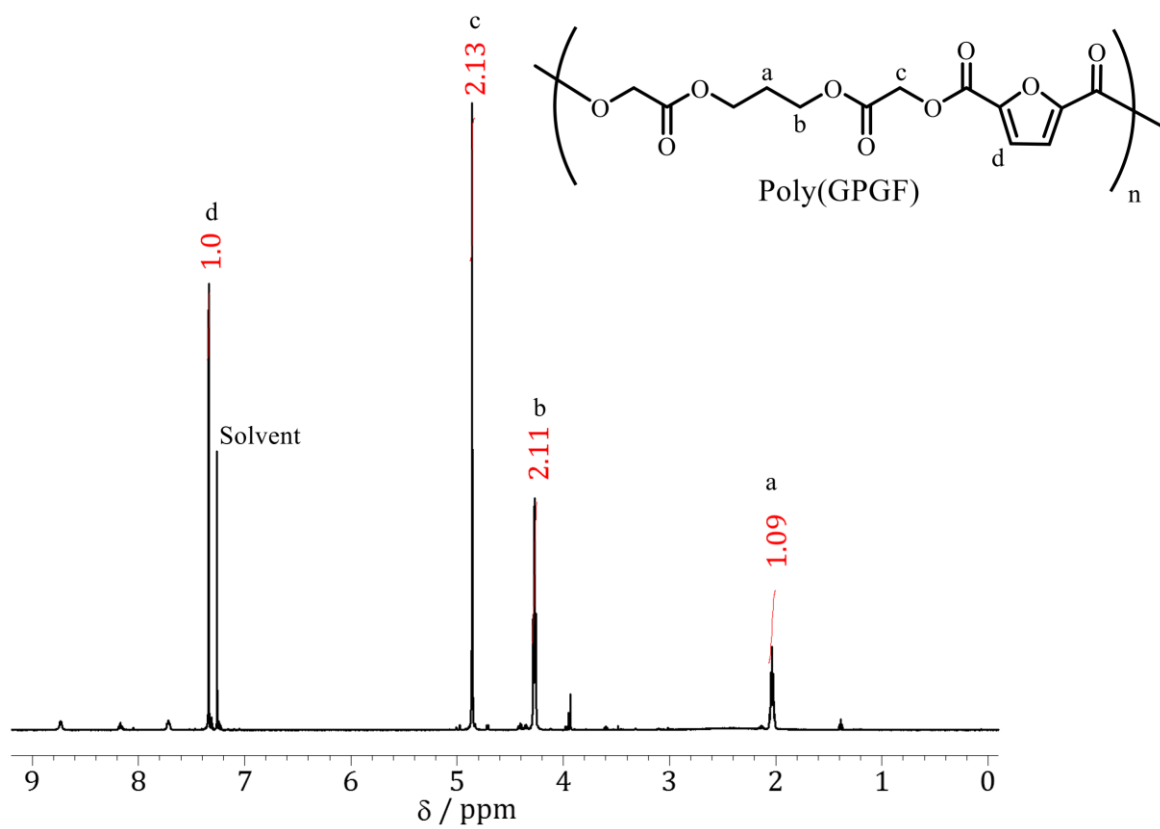

**Figure S4:**  $^1\text{H}$  NMR spectrum of poly(GPGF) (Run 9) ( $\text{CDCl}_3$ , 500 MHz, r.t.).

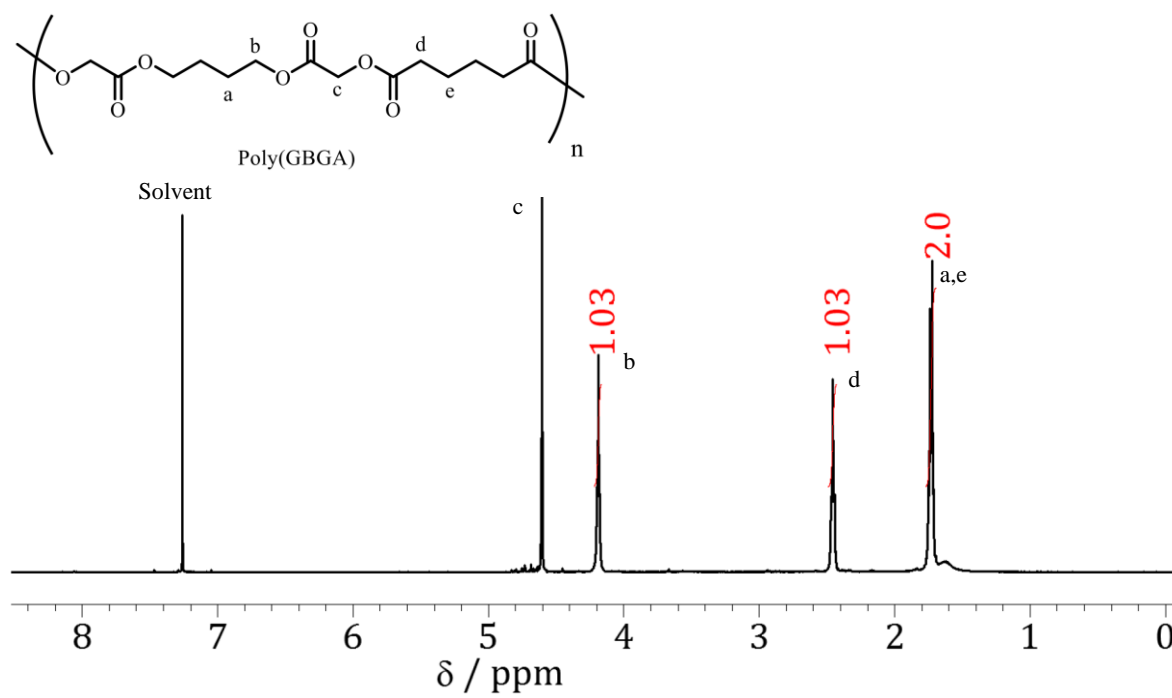

**Figure S5:**  $^1\text{H}$  NMR spectrum of poly(GBGA) (Run 14) ( $\text{CDCl}_3$ , 500 MHz, r.t.).

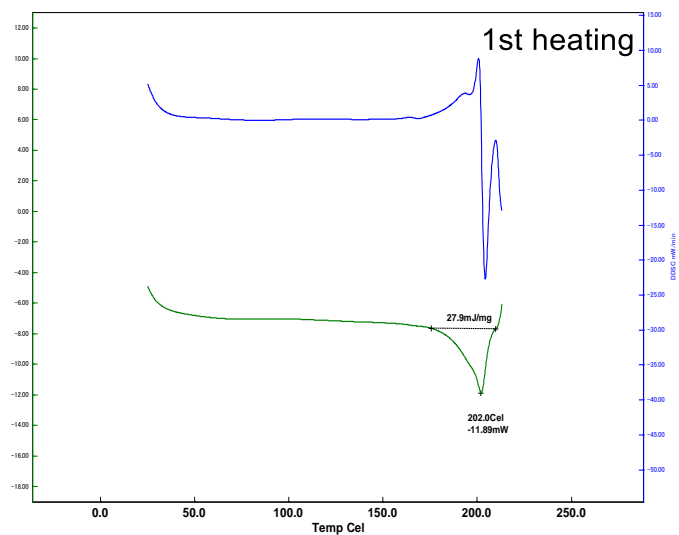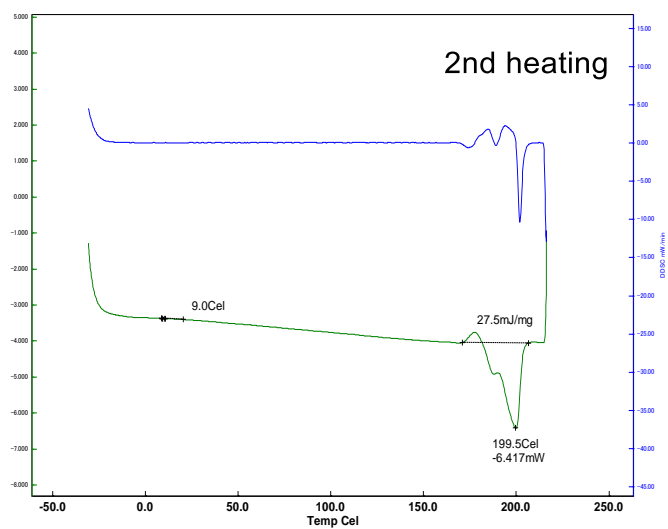

**Figure S6:** DSC profiles of poly(GBGT) (Run 1).

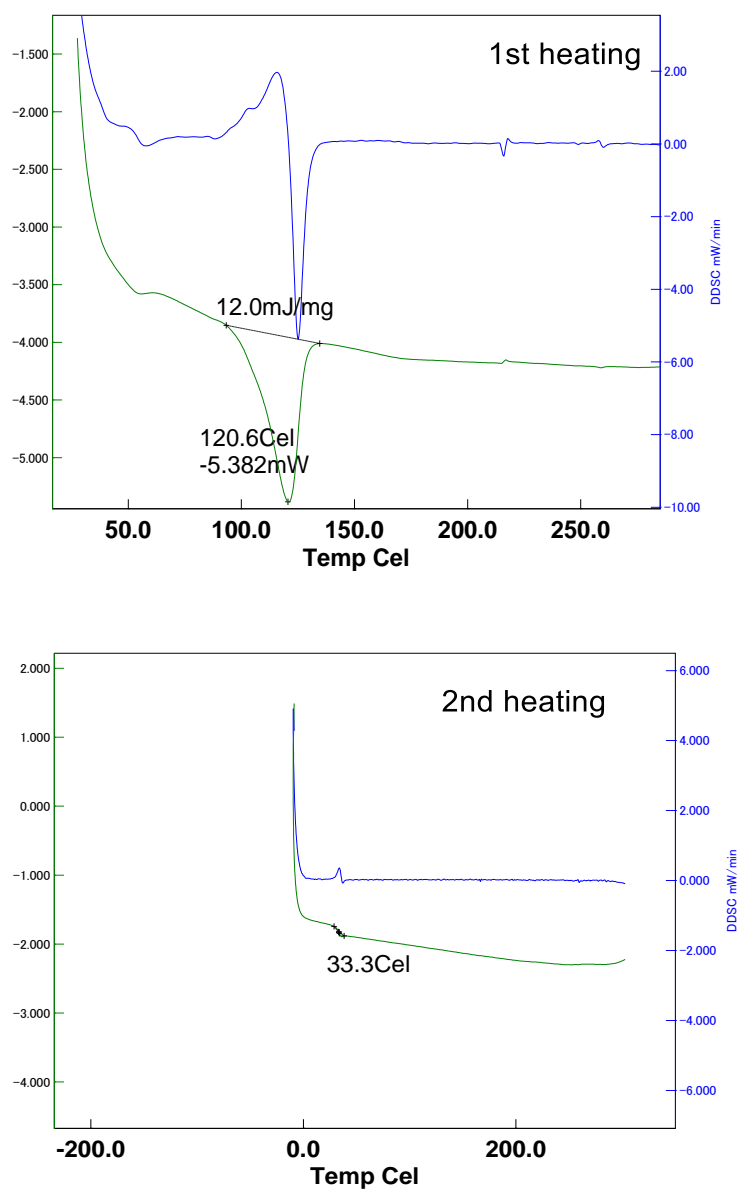

**Figure S7:** DSC profiles of poly(GPGT) (Run 4).



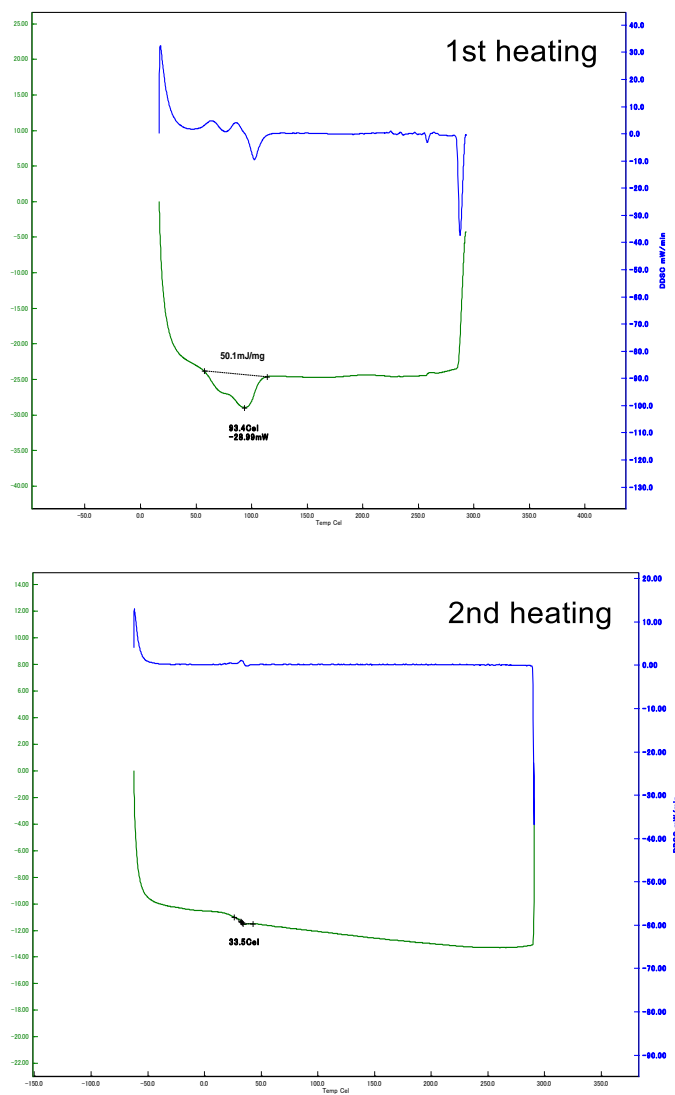

**Figure S8:** DSC profiles of poly(GBGF) (Run 7).

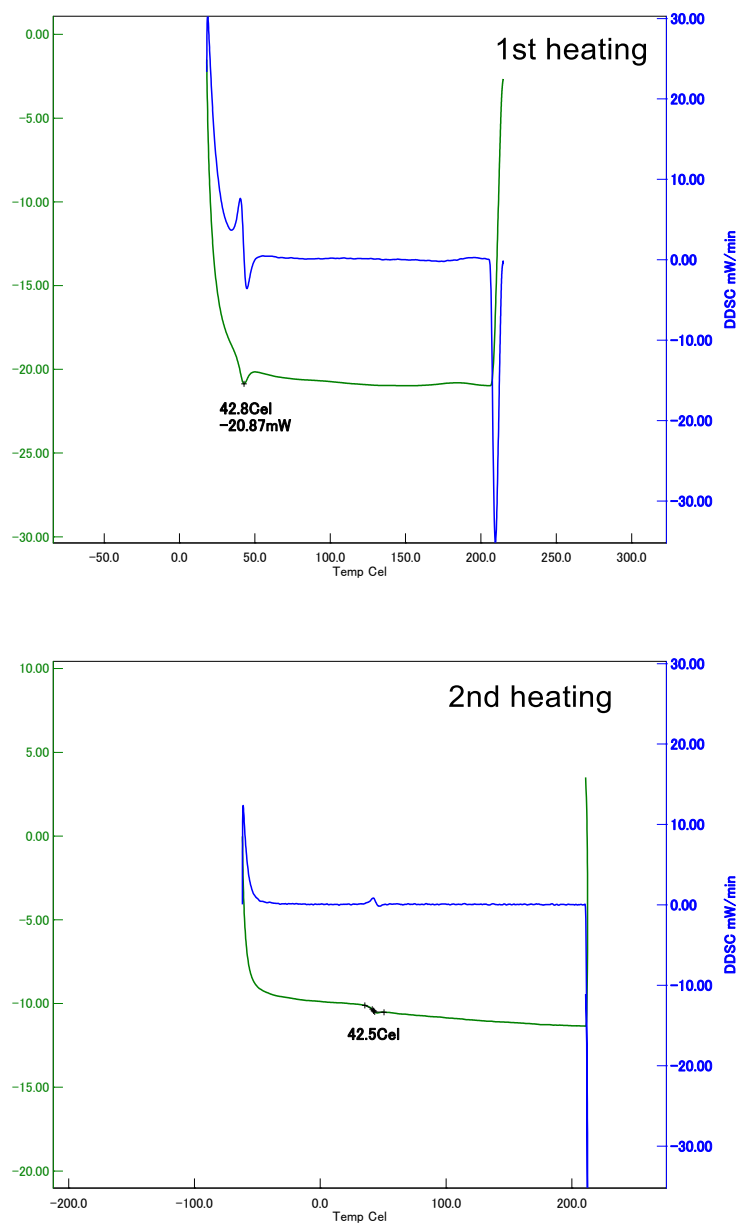

**Figure S9:** DSC profiles of poly(GPGF) (Run 11).

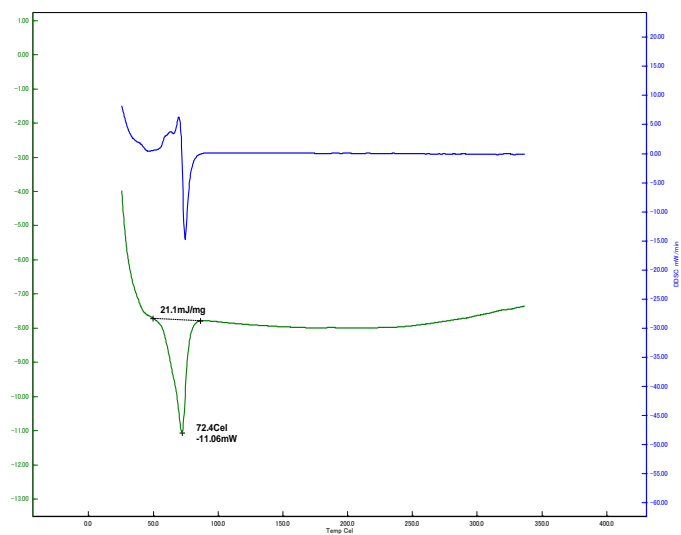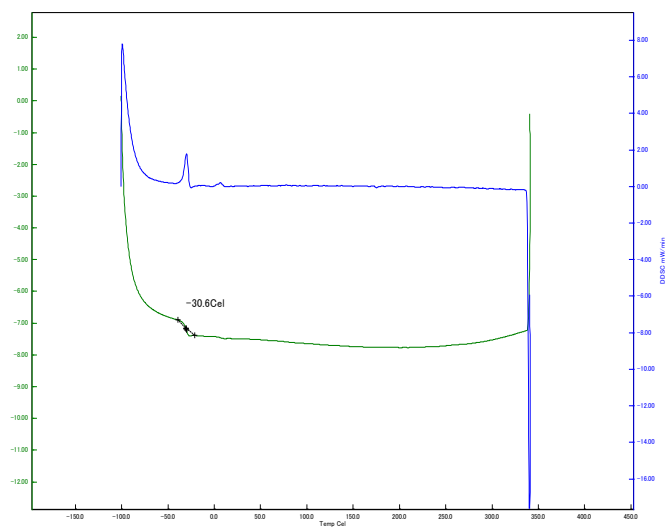

**Figure S10:** DSC profiles of poly(GBGA) (Run 12).
